# Supplementary material
Source: PubMed Central journal article supplement (PMC3310327)
Supplement: NIHMS359478-supplement-1_si_001.pdf [file NIHMS359478-supplement-1_si_001.pdf]

**SUPPORTING INFORMATION:**

**Online coupling of digital microfluidic devices with mass spectrometry detection using  
an eductor with electrosonic spray ionization**

Christopher A. Baker and Michael G. Roper\*

Department of Chemistry and Biochemistry, Florida State University, 95 Chieftain Way,  
Tallahassee, FL 32306

Keywords: electrowetting, Venturi, droplet, ambient ionization

\*Address Correspondence to:  
Dr. Michael G. Roper  
Department of Chemistry and Biochemistry  
Florida State University  
95 Chieftain Way  
Tallahassee, FL 32306  
Ph 850-644-1846  
Fx 850-644-8281  
E-mail: [roper@chem.fsu.edu](mailto:roper@chem.fsu.edu)

**Table S-1.** ANOVA table for average peak area response

| Source | df | F value | p value  |
|--------|----|---------|----------|
| Model  | 3  | 13.40   | < 0.0001 |
| x      | 1  | 39.72   | < 0.0001 |
| V      | 1  | 0.76    | 0.032    |
| P      | 1  | 22.31   | 0.116    |

**Table S-2.** ANOVA table for peak area RSD response

| Source         | df | F value | p value |
|----------------|----|---------|---------|
| Model          | 6  | 4.77    | 0.003   |
| x              | 1  | 3.38    | 0.079   |
| y              | 1  | 0.04    | 0.837   |
| V              | 1  | 1.51    | 0.232   |
| P              | 1  | 9.13    | 0.006   |
| VP             | 1  | 3.14    | 0.090   |
| y <sup>2</sup> | 1  | 11.4    | 0.003   |

df = degrees of freedom
